1                    **Insecticide resistance status of *Aedes aegypti* in Bangladesh**

2

3    Hasan Mohammad Al-Amin<sup>1,2</sup>, Fatema Tuj Johora<sup>1</sup>, Seth R. Irish<sup>3,4</sup> Muhammad Riadul

4    Haque Hossainey<sup>1,5</sup>, Lucrecia Vizcaino<sup>3</sup>, Kishor Kumar Paul<sup>1,6</sup>, Wasif A. Khan<sup>1</sup>, Rashidul

5    Haque<sup>1</sup>, Mohammad Shafiul Alam<sup>1\*¶</sup>, Audrey Lenhart<sup>3\*¶</sup>

6

7    <sup>1</sup>Infectious Diseases Division, International Centre for Diarrhoeal Disease Research  
8    Bangladesh (icddr,b), 68 Shaheed Tajuddin Ahmed Sarani, Mohakhali, Dhaka 1212,  
9    Bangladesh

10  
11    <sup>2</sup>QIMR Berghofer Medical Research Institute (QIMR Berghofer), Brisbane, Queensland,  
12    4006, Australia

13  
14    <sup>3</sup>Division of Parasitic Diseases and Malaria, Center for Global Health, Centers for Disease  
15    Control and Prevention, Atlanta, Georgia, United States of America

16  
17    <sup>4</sup>President Malaria Initiative, Bureau for Global Health, Office of Infectious Disease, United  
18    Agency for International Development, Washington, DC, United States of America

19  
20    <sup>5</sup>Department of Biological Sciences, George Washington University, Washington, DC,  
21    20052, United States of America

22  
23    <sup>6</sup>The Kirby Institute, University of New South Wales, Sydney, NSW, Australia

24

25

26

27    \* Corresponding author

28    Email: shafiul@icddr.org, ajl8@cdc.gov

29

30    ¶ These authors contributed equally to this work

## 31 **Abstract**

32 Arboviral diseases including dengue and chikungunya are a major public health concern in  
33 Bangladesh, with unprecedented levels of transmission reported in recent years. The primary  
34 approach to control these diseases is control of *Aedes aegypti* using pyrethroid insecticides.  
35 Although chemical control is long-practiced, no comprehensive analysis of *Ae. aegypti*  
36 susceptibility to insecticides has previously been conducted. This study aimed to determine  
37 the insecticide resistance status of *Ae. aegypti* in Bangladesh and investigate the role of  
38 detoxification enzymes and altered target site sensitivity as resistance mechanisms. *Aedes*  
39 eggs were collected using ovitraps from five districts across the country and in eight  
40 neighborhoods of the capital city Dhaka from August to November 2017. CDC bottle  
41 bioassays were conducted for permethrin, deltamethrin, malathion, and bendiocarb using 3-5-  
42 day old F<sub>0</sub>-F<sub>2</sub> non-blood fed female mosquitoes. Biochemical assays were conducted to detect  
43 metabolic resistance mechanisms and real-time PCR was performed to determine the  
44 frequencies of the knockdown resistance (*kdr*) mutations Gly1016, Cys1534, and Leu410.  
45 High levels of resistance to permethrin were detected in all *Ae. aegypti* populations, with  
46 mortality ranging from 0 – 14.8% at the diagnostic dose. Substantial resistance continued to  
47 be detected against higher (2X) doses of permethrin (5.1 – 44.4% mortality). Susceptibility to  
48 deltamethrin and malathion varied between populations while complete susceptibility to  
49 bendiocarb was observed in all populations. Significantly higher levels of esterase and  
50 oxidase activity were detected in most of the test populations as compared to the susceptible  
51 reference Rockefeller strain. A significant association was detected between permethrin  
52 resistance and the presence of Gly1016 and Cys1534 homozygotes. The frequency of *kdr*  
53 alleles varied across the Dhaka populations, and Leu410 was not detected in any of the tested  
54 populations. The detection of widespread pyrethroid resistance and multiple mechanisms  
55 highlights the urgency for implementing alternate *Ae. aegypti* control strategies. In addition,

56 implementing routine monitoring of insecticide resistance in *Ae. aegypti* in Bangladesh will  
57 lead to a greater understanding of susceptibility trends over space and time, thereby enabling  
58 the development of improved control strategies.

## 59 **Author summary**

60 Globally, arboviral diseases including dengue, chikungunya, and Zika are major public health  
61 problems. Bangladesh recently experienced its two worst outbreaks of chikungunya and  
62 dengue, involving hundreds of thousands of people. The principal vector of these diseases,  
63 the *Aedes aegypti* mosquito, is present throughout Bangladesh, especially in the major cities  
64 including the capital, Dhaka. The control of *Ae. aegypti* in Bangladesh has long been based  
65 on space sprays by thermal fogging of pyrethroid insecticides. However, no comprehensive  
66 assessment has previously been conducted to understand the insecticide resistance status of  
67 *Ae. aegypti*. We tested *Ae. aegypti* collected from places of historical arboviral outbreaks to  
68 determine their insecticide resistance status, as well as some of the underlying mechanisms  
69 causing the resistance. All of the populations tested were highly resistant to permethrin, the  
70 key insecticide used by vector control programs in Dhaka, with varying degrees of resistance  
71 to deltamethrin and malathion, and full susceptibility to bendiocarb. High levels of esterase  
72 and oxidase enzyme activity and the presence of mutations on the voltage-gated sodium  
73 channel gene were detected as key mechanisms underpinning the resistance. The findings of  
74 this study provide the first comprehensive evidence base for improving *Ae. aegypti* control  
75 strategies in Bangladesh.

76

77

## 78 **Introduction**

79 *Aedes (Stegomyia) aegypti* (Linnaeus, 1762) is an important vector of arboviral diseases,  
80 principally dengue, chikungunya, and Zika. These increasingly common arboviral infections  
81 cause severe febrile illness and short to long-term physical or cognitive impairments and even  
82 death. Dengue is the most globally prevalent and rapidly spreading arboviral disease, with an  
83 estimated 390 million annual infections and 3.9 billion people at risk [1]. Chikungunya is also  
84 increasingly prevalent, and the prolonged pain and rheumatism resulting from infection can  
85 result in long-term physical problems and impaired daily life [2, 3]. Recently, Zika caused a  
86 major global pandemic in 2015-2016, leading to congenital malformations, Guillain-Barre  
87 syndrome, and other severe neurological complications [4].

88 The burden of arboviral diseases in Bangladesh is not well documented. The first major  
89 outbreak of dengue took place during the 2000 monsoon, and caused 5,521 officially reported  
90 cases with 93 deaths [5]. Since then, thousands of infections are reported each year although  
91 these numbers represent a fraction of the actual burden since only admitted cases in some  
92 selected hospitals are officially reported [6]. Recent estimates suggest that 40 million people  
93 have been infected nationally with an average of 2.4 million infections annually. Cases are  
94 mostly concentrated in the capital city Dhaka, where the seropositivity ranges from 36 to  
95 85% [7]. In 2019, Bangladesh experienced its largest outbreak with 101,354 confirmed cases  
96 and 164 deaths [8]. Since 2008, sporadic infections with chikungunya virus have been  
97 reported across Bangladesh, with the largest outbreak occurring in 2017 which infected  
98 hundreds of thousands of inhabitants of Dhaka [9]. Zika virus transmission has not been  
99 widely reported, with only a single confirmed case in 2016 in a 67-year old man from  
100 Chittagong who had not traveled outside of Bangladesh. Although a few additional Zika virus  
101 infections were detected by antibody tests, there is no further evidence of Zika in Bangladesh  
102 [10, 11].

103 *Aedes aegypti* is the principal vector of dengue, Zika, and chikungunya. It is highly  
104 abundant throughout Bangladesh, especially in Dhaka [7]. In 2018, the Breteau Index (BI; the  
105 number of *Aedes*-positive containers per 100 houses inspected) was greater than 100 in some  
106 parts of Dhaka [12]. Recent studies in Dhaka confirmed that plastic containers (plastic drums,  
107 buckets, plastic bags, bottles, and disposable cups) and discarded vehicle and construction  
108 materials (tires, battery shells, and cement mixers) are key containers for *Aedes* production.  
109 These are typical of the domestic and industrial detritus that encourage the proliferation of  
110 *Ae. aegypti* across the globe. High *Aedes* abundance in Dhaka is also strongly associated with  
111 favorable climatic factors including rainfall, temperature, and humidity [13].

112 In the absence of effective therapeutic drugs and vaccines, *Ae. aegypti* control is presently  
113 the only approach for preventing and controlling the transmission of most *Aedes*-borne  
114 arboviruses. *Aedes aegypti* control strategies rely heavily on the application of a limited  
115 number of chemical insecticides approved for public health use, principally pyrethroids,  
116 organochlorines, organophosphates, and carbamates [14]. Of these, pyrethroid insecticides  
117 such as deltamethrin, cypermethrin, and permethrin are commonly used because of their low  
118 toxicity to mammals and their high efficacy against vectors. However, resistance to many  
119 insecticides has emerged in *Ae. aegypti* across the globe and is a serious threat to control  
120 programs [15-19].

121 Resistance to insecticides is a dynamic evolutionary process, driven by insecticide  
122 selection pressures [20]. Resistance can be caused by physiological changes including 1)  
123 changes to the mosquito cuticle so insecticides cannot penetrate, 2) increased activity of  
124 insecticide detoxification enzymes, and/or 3) structural modifications at the target site of the  
125 insecticide or by behavioral adaptations like insecticide avoidance [21].

126 Target site alterations resulting in resistance to pyrethroids and DDT are often caused by  
127 mutations in the voltage-gated sodium channel (VGSC) transmembrane protein and are  
128 broadly referred to as ‘knockdown resistance’ (*kdr*) mutations. There are several point  
129 mutations on the VGSC gene known to confer *kdr*-type insecticide resistance in *Ae. aegypti*,  
130 most notably at positions 410, 1016 and 1534 [22, 23]. Increased enzyme activity resulting in  
131 metabolic resistance typically involves any of the three main groups of detoxification  
132 enzymes: carboxylesterases, multi-function oxidases (MFOs), and glutathione S-transferases  
133 (GSTs) [24]. Understanding the mechanisms of resistance and their specificity amongst  
134 insecticides is important to devising strategies to mitigate and manage insecticide resistance  
135 when it is detected.

136 Although there is a recognized increase of *Aedes*-borne arboviruses in Bangladesh over the  
137 last 20 years, little or no organized use of insecticides against *Ae. aegypti* has occurred.  
138 Regular control activities are mostly carried out only in Dhaka, targeting the nuisance biting  
139 *Culex quinquefasciatus* and *Aedes* by thermal fogging with a combination of pyrethroid  
140 insecticides including permethrin, prallethrin, and tetramethrin/bioallethrin. Rising *Aedes*-  
141 borne viral diseases indicate little impact of these insecticides being used. Development of  
142 resistance against commonly used insecticides in local *Aedes* population may contribute to  
143 the failure of the vector control strategy. Occasional source reduction is also carried out by  
144 community engagement by both government and private initiatives. However, gaining access  
145 to all premises and achieving sufficient coverage of myriad oviposition sites in densely  
146 populated cities like Dhaka is a huge challenge [25]. There are also structural challenges to  
147 control activities related to management, evaluation, and budget [26, 27]. The insecticide  
148 resistance status of *Ae. aegypti* has not previously been comprehensively assessed in  
149 Bangladesh. The purpose of this study was to assess the insecticide resistance status and

150 resistance mechanisms of key *Ae. aegypti* populations in Bangladesh to better guide future  
151 insecticide choices for vector control.

## 152 **Methods**

### 153 **Study sites**

154 Mosquitoes were collected from five districts throughout Bangladesh. Of these, the capital  
155 city, Dhaka and Chittagong are the high-transmission settings and Rajshahi and Chapai  
156 Nawabganj are low-transmission settings [9, 28-32] (Fig 1). The other district, Bandarban,  
157 was selected as it is endemic for malaria and deltamethrin based long-lasting insecticidal nets  
158 (LLINs) are regularly distributed with seasonal sporadic indoor residual spraying (IRS) [33,  
159 34]. Since the majority of *Aedes*-borne arboviral infections are reported from Dhaka, eight  
160 areas within Dhaka City were selected for sampling [35].

### 161 **Collection of *Aedes* eggs**

162 Eggs were collected using ovitraps baited with a grass infusion. Ovitrap consisted of black  
163 2L containers made of plastic and an oviposition substrate of seed germination paper. The  
164 ovitraps were filled with 50ml of 2-3-day old grass infusion and 1200ml of tap or rainwater.  
165 After obtaining verbal consents from the household owners, the ovitraps were placed  
166 primarily indoors including the main living area (under beds), behind refrigerators, under  
167 stairways, in garages, and on balconies. When these sites were not suitable, ovitraps were set  
168 in the yards under sheds close to the house. Within Dhaka, the number of ovitraps varied  
169 from 50-70 per location, whereas in the areas outside of Dhaka (non-Dhaka), ~100 ovitraps  
170 were set in each location. For all other non-Dhaka districts except Chittagong, eggs were  
171 collected from one urban and one rural location. Eggs were collected in 2017 during the  
172 traditional peak dengue transmission months from August to November.

173 **Mosquito rearing**

174 Ovitrap were collected after six days *in situ*. Upon collection, the germination papers were  
 175 dried and sent to the insectary at the Animal Research Facilities, International Centre for  
 176 Diarrhoeal Disease Research, Bangladesh (icddr,b) in Dhaka. Due to unexpectedly long time  
 177 required to prepare the rearing facility, mosquito rearing was delayed until December 2017.  
 178 Given this delay, hatching rates were low for several locations, so in several cases, eggs from  
 179 adjacent locations were merged into a single population (Table 1). Mosquitoes were reared at  
 180 a constant temperature (26-28 °C) and humidity (70-80%). When possible, mosquitoes were  
 181 reared to the F2 generation to obtain sufficient numbers for a wide range of susceptibility  
 182 tests. Artificial blood-feeding was provided using the methods described by Costa-da-Silva *et*  
 183 *al.* [36]. Adult mosquitoes were provided with 10% sucrose solution. In addition to the field  
 184 populations, the ‘Rockefeller’ (ROCK) insecticide susceptible *Ae. aegypti* reference strain  
 185 was obtained from the U.S. Centers for Disease Control and Prevention (CDC, Atlanta, USA)  
 186 and reared for use as a susceptible control in the bioassays.

187 Table 1. Summary of *Ae. aegypti* populations tested in this study

| Ovitrap Collection Sites |          |                       | Final population*<br>for bioassay | Generation<br>Tested |
|--------------------------|----------|-----------------------|-----------------------------------|----------------------|
| Location                 | District | Location              |                                   |                      |
| Dhaka                    | Dhaka    | Azimpur               | Azimpur                           | F0                   |
|                          |          | Dhanmondi             | Dhanmondi &<br>Mohammadpur        | F0-F2                |
|                          |          | Mohammadpur           |                                   |                      |
|                          |          | Gulshan               | Gulshan & Karail                  | F0-F2                |
|                          |          | Karail                |                                   |                      |
|                          |          | Mipur                 | Mipur                             | F1-F2                |
|                          |          | Malibagh              | Malibagh                          | F2                   |
|                          |          | Uttara                | Uttara                            | F1-F2                |
| Non-Dhaka                | Rajshahi | Rajshahi City (Urban) | Rajshahi                          | F2                   |
|                          |          | Poba (Rural)          |                                   |                      |



|  |                  |                               |                                                        |       |
|--|------------------|-------------------------------|--------------------------------------------------------|-------|
|  | Chapai Nawabganj | Chapai Nawabganj City (Urban) | Chapai Nawabganj                                       | F2    |
|  |                  | Shibganj (Rural)              |                                                        |       |
|  | Bandarban        | Bandarban City (Urban)        | Bandarban                                              | F0-F2 |
|  |                  | Rowangchhari (Rural)          | No <i>Ae. aegypti</i> , all were <i>Ae. albopictus</i> | NA    |
|  | Chittagong       | Chittagong City               | Chittagong                                             | F0-F2 |

188 \*For ease of description mosquitoes from each location is considered as population

### 189 **Insecticide susceptibility testing**

190 Susceptibility tests were conducted following the CDC bottle bioassay protocol [37] using 3-  
191 5-day old, non-blood fed female mosquitoes. Four insecticides belonging to three major  
192 classes were tested for each population when sufficient mosquitoes were available: the  
193 pyrethroids permethrin and deltamethrin, the organophosphate malathion, and the carbamate  
194 bendiocarb. Mosquitoes were exposed to the diagnostic dose of the insecticide, and when  
195 resistance was detected and sufficient mosquitoes were available, resistance intensity assays  
196 were also conducted by exposing mosquitoes to 2X and/or 5X the diagnostic dose. All  
197 bioassays comprised >100 mosquitoes per insecticide per population across four test bottles  
198 and 15-25 mosquitoes in an untreated control bottle. Susceptibility status was recorded after  
199 0, 15, and 30 minutes of insecticide exposure. Mosquitoes unable to stand were considered  
200 dead [37]. Mortality data were interpreted according to WHO recommendations, with <90%  
201 mortality in a population corresponding to resistance [38].

### 202 **Biochemical assays**

203 To detect potential metabolic mechanisms of resistance through the altered activity of  
204 detoxifying enzymes, biochemical assays were performed [39]. From each population, 30, 1-  
205 2-day old mosquitoes were tested for activities of non-specific  $\beta$  esterase ( $\beta$ -EST), mixed-  
206 function oxidase (MFO), acetylcholine esterase (AChE), and insensitive acetylcholine

207 esterase (IACHe), with a protein assay conducted for each mosquito to control for differences  
208 in body size. All mosquitoes were freeze killed and kept at -20 °C until analysis. Briefly,  
209 mosquitoes were individually homogenized in 100µl of potassium phosphate buffer followed  
210 by dilution to 2ml with additional buffer. For all tests, mosquito homogenates were run in  
211 triplicate on 96-well round-bottom microplates (Corning, NY, USA). Homogenates of the  
212 Rockefeller (ROCK) susceptible *Ae. aegypti* reference strain was used as a comparator.

213 For the β-EST assay, 100µl of mosquito homogenate was added in each well followed by  
214 100µl β-naphthyl acetate. The plate was then incubated at room temperature for 20 minutes.  
215 After adding 100µl Fast Blue in each well, the plate was further incubated at room  
216 temperature for 4 minutes and read by a spectrophotometer (BioTek, VT, USA) using a  
217 540nm filter.

218 For the MFO assay, 100µl of mosquito homogenate was added to each well followed by  
219 200µl of 3,3,5,5-tetramethylbenzidine (TMBZ) and 25µl 3% hydrogen peroxide. The plate  
220 was incubated for 10 minutes and read by a spectrophotometer using a 620nm filter.

221 For the AChE assay, 100µl of mosquito homogenate was added to each well followed by  
222 100µl of acetylthiocholine iodide (ATCh) and 100µl dithio-bis-2-nitrobenzoic acid (DTNB).  
223 The plate was read immediately ( $T_0$ ) using a 414nm filter and a second reading was taken  
224 after 10 minutes ( $T_{10}$ ). The absorbance at  $T_0$  was subtracted from  $T_{10}$  and used as the value  
225 for data analysis.

226 The IACHe assay was similar to the AChE assay, with the addition of propoxur to the  
227 ATCh to quantify the extent to which propoxur inhibited the reaction.

228 The total protein content of each mosquito was measured by adding 20µl of the homogenate  
229 to a well together with 80µl of potassium phosphate and 200µl of protein dye. The plate was  
230 read immediately using a 620nm filter.

231 **DNA extraction**

232 DNA extraction was carried out using the REDExtract-N-Amp™ tissue kit (Merck,  
233 Germany) according to the manufacturer's protocol. Briefly, individual mosquitoes were  
234 placed in 1.5ml microcentrifuge tubes and mixed with 100µl of extraction solution and 25µl  
235 of tissue preparation solution. Tubes were then incubated at room temperature for 10 minutes  
236 followed by further incubation for 3 minutes at 95°C. Then, 100µl of neutralization solution  
237 B was added to the sample and the sample was mixed by vortexing.

238 **Detection of *kdr* alleles (Gly1016, Cys1534, and Leu410)**

239 To understand the correlation between phenotypic resistance and the presence of the *kdr*  
240 alleles Gly1016, Cys1534C, and Leu410, phenotyped mosquitoes exposed to permethrin and  
241 deltamethrin in the bioassays underwent real-time PCR. An additional 30 non-phenotyped  
242 mosquitoes from each of the six Dhaka populations were analyzed to estimate the population-  
243 level allele frequencies.

244 The Gly1016 PCR was performed following the protocol described by Saavedra-Rodriguez  
245 *et al.* [40]. Each reaction contained 4.5µl of iQ-SYBR Green Supermix (Bio-Rad  
246 Laboratories Inc, CA, USA), 0.45µl of each primer, one common Gly forward (5'-ACC GAC  
247 AAA TTG TTT CCC-3'), one reverse primer for either Val (5'-GCG GGC AGC AAG GCT  
248 AAG AAA AGG TTA ATT A-3') or Gly (5'-GCG GGC AGG GCG GGG GCG GGG CCA  
249 GCA AGG CTA AGA AAA GGT TAA CTC-3'), 1µl of template DNA and ddH<sub>2</sub>O for a  
250 final reaction volume of 9µl. Thermal cycling conditions were: 95°C for 3 min; 40 cycles of  
251 95°C for 10 sec, 58°C for 10 sec, 72°C for 30 sec; 95°C for 10 sec and a ramp from 65°C to  
252 95°C at a rate of 0.2°C/10 sec for melting curve analysis.

253 The Cys1534 PCR was based on the protocol described by Yanola *et al.* [41]. Each reaction  
254 contained 4.5µl of iQ-SYBR Green Supermix (Bio-Rad Laboratories Inc, CA, USA), 0.45µl

255 Cys forward primer (5'-GCG GGC AGG GCG GCG GGG GCG GGG CCT CTA CTT TGT  
256 GTT CTT CAT CAT GTG-3'), and 0.45µl each of Phe forward (5'-GCG GGC TCT ACT  
257 TTG TGT TCT TCA TCA TAT T-3') and a common reverse primer (5'-TCT GCT CGT  
258 TGA AGT TGT CGA T-3'), 1µl of template DNA and ddH<sub>2</sub>O for a final reaction volume of  
259 9µl. Thermal cycling conditions were: 95°C for 3 min; 40 cycles of 95°C for 10 sec, 57°C for  
260 10 sec, 72°C for 30 sec; 95°C for 10 sec and a ramp from 65°C to 95°C at a rate of 0.5°C/5  
261 sec for melting curve analysis.

262 The Leu410 PCR was performed based on the protocol described by Saavedra-Rodriguez *et*  
263 *al.* [42]. Each reaction contained 4.5µl of iQ-SYBR Green Supermix (Bio-Rad Laboratories  
264 Inc, CA, USA), 0.45µl of each primer, Val forward primer (5'GCG GGC AGG GCG GCG  
265 GGG GCG GGG CCA TCT TCT TGG GTT CGT TCT ACC GTG-3'), Leu forward primer  
266 (5'-GCG GGC ATC TTC TTG GGT TCG TTC TAC CAT T-3') and a common reverse  
267 primer (5'-TTC TTC CTC GGC GGC CTC TT-3'), 1µl of template DNA and ddH<sub>2</sub>O for a  
268 final reaction volume of 9µl. Thermal cycling conditions were: 95°C for 3 min; 40 cycles of  
269 95°C for 10 sec, 60°C for 10 sec, 72°C for 30 sec; 95°C for 10 sec and a ramp from 65°C to  
270 95°C at a rate of 0.2°C/10 sec for melting curve analysis.

## 271 **Data analysis**

272 Percent mortality at the diagnostic time of 30 minutes was used to describe the susceptibility  
273 status of the mosquito populations tested. Populations were classified as resistant and  
274 susceptible based on WHO and CDC guidelines [37, 38]: when mortality was <90% the  
275 population was considered as resistant, mortality between 90 - 97% suggested that the  
276 population was developing resistance, and mortality ≥98% represented a susceptible  
277 population. The 95% confidence intervals (CI) were calculated for the percent mortalities  
278 from the bioassays and for allele frequencies.

279 Interquartile ranges of the mean of the optical density (OD) values from the biochemical  
280 assays were compared between the study populations and the susceptible reference strain.  
281 Regression analyses were performed to measure the statistical significance of differences  
282 between the mean OD values between populations.

283 Pearson chi-square tests were performed to understand the associations between Gly1016  
284 and Cys1534 genotypes and phenotypes of bioassayed mosquitoes. The population-level  
285 allele frequencies were calculated using the following equation [43]:

$$\frac{n \text{ heterozygoes} + 2(n \text{ homozygotes})}{2(\text{total } n \text{ mosquito analyzed})}$$

286 The linkage disequilibrium, departures from the Hardy-Weinberg equilibrium (HWE) and  
287 the p-value for Gly1016 and Cys1534 in each population were assessed using Fisher's exact  
288 test in Gene pop (version 4.2) (<https://genepop.curtin.edu.au/>) [44]. Statistical analyses were  
289 conducted in Microsoft Excel 2016 (Microsoft Inc.) and Stata 15 (StataCorp LLC, TX, USA).

## 290 **Results**

### 291 **Insecticide bioassays**

292 In the populations from Dhaka, *Ae. aegypti* mortality ranged between 0% in Malibagh to  
293 6.7% in Gulshan & Karail at the diagnostic dose of permethrin. A higher dose of permethrin  
294 (2X the diagnostic dose) was tested with the populations of Dhanmondi & Mohammadpur  
295 and Gulshan & Karail but still resulted in <50% mortality at the diagnostic time. In contrast,  
296 mortality to deltamethrin varied between areas of Dhaka, ranging from 49.0% (95% CI  $\pm$  7.3)  
297 in Gulshan & Karail to 100% (95% CI  $\pm$  1.6) in Uttara. Susceptibility to malathion was tested  
298 in three populations from Dhaka. While the Gulshan & Karail population was resistant  
299 (62.9% mortality, 95% CI  $\pm$  2.7), the Dhanmondi & Mohammadpur (98.1% mortality, 95%  
300 CI  $\pm$  2.7) and Uttara (100% mortality, 95% CI  $\pm$  2.1) populations were susceptible. All Dhaka

301 populations tested against bendiocarb were susceptible (100% mortality in all populations)  
302 (Fig 1).

303 The *Ae. aegypti* populations sampled from the non-Dhaka locations were also highly  
304 resistant to permethrin, with mortality ranging from 0% in the Chapai Nawabganj population  
305 to 14.8% (95% CI  $\pm$  2.0) in the Rajshahi population. When the concentration of permethrin  
306 was increased to 2X in Chittagong, mortality was still <50%. However, when the permethrin  
307 concentration was increased to 5X in Bandarban, the population was fully susceptible (100%  
308 mortality). While the Chapai Nawabganj (100% mortality, CI  $\pm$  0.79) and Chittagong (99.0%  
309 mortality, 95% CI  $\pm$  0.79) populations were susceptible to deltamethrin, the Bandarban  
310 population was resistant to deltamethrin at the diagnostic dose (67% mortality, 95% CI  $\pm$  6.1)  
311 but susceptible when the concentration was increased to 2X (99.1% mortality, 95% CI  $\pm$   
312 0.79). The Bandarban population was also resistant to the diagnostic dose of malathion  
313 (75.7% mortality, 95% CI  $\pm$  4.6) but susceptible to malathion 2X (100% mortality). The  
314 ROCK strain was confirmed to be fully susceptible to the diagnostic doses of the four  
315 insecticides. A summary of bioassay data is presented in Fig 2.

### 316 **Biochemical assays**

317 All *Ae. aegypti* populations tested from field collections had significantly higher ( $p < 0.0001$ )  
318 MFO activity compared to ROCK. The  $\beta$ -EST activity levels of *Ae. aegypti* populations from  
319 Azimpur, Uttara, Dhanmondi & Mohammadpur, Gulshan & Karail, Malibagh, Mirpur, and  
320 Bandarban were significantly ( $p < 0.0001$ ) higher than the ROCK reference strain. However,  
321  $\beta$ -EST levels in the non-Dhaka sites of Chapai Nawabganj, Chittagong, and Rajshahi  
322 populations were significantly lower than ROCK ( $p < 0.0001$ ). In the case of AChE activity,  
323 populations from Azimpur ( $p < 0.042$ ), Chittagong ( $p < 0.019$ ), and Gulshan & Karail  
324 ( $p < 0.0001$ ) were significantly higher and Dhanmondi & Mohammadpur ( $p < 0.001$ ) and

325 Malibagh ( $p < 0.001$ ) were significantly lower than ROCK. The estimated levels of IACHe  
326 were significantly higher ( $p < 0.0001$ ) in the Gulshan & Karail population compared to  
327 ROCK, which suggests that AChE insensitivity may exist in this population. Levels were low  
328 across the remaining populations, suggesting that the target site remains sensitive. However,  
329 it is noteworthy that levels were significantly lower than ROCK in Bandarban, Chapai  
330 Nawabganj, Mirpur, and Uttara ( $p < 0.001$ ). When total protein content was compared between  
331 mosquito populations, except Azimpur and Mirpur, all populations were significantly  
332 ( $p < 0.026$ ) lower than ROCK, suggesting that the body sizes were generally smaller for most  
333 of the field populations (Fig 3).

#### 334 **Knockdown resistance (*kdr*) genotyping**

335 A total of 142 phenotyped mosquitoes from permethrin 1X bioassays and 59 phenotyped  
336 mosquitoes from deltamethrin 1X bioassays were analyzed for the Gly1016 mutation. From  
337 the Dhaka mosquito populations exposed to permethrin, 37.8% (28/74) of the survivors  
338 (alive) were mutant homozygotes (GG) and 29.7% (22/74) were wild type homozygotes  
339 (VV). The correlations between genotype and phenotype of permethrin-exposed Dhaka  
340 mosquitoes were statistically significant ( $p < 0.0001$ ). Most of the dead mosquitoes were wild-  
341 type homozygotes (12/14, 85.7%). Amongst the mosquitoes from sites outside of Dhaka,  
342 more than half of the permethrin survivors were heterozygotes (23/44, 52.3%,) and there was  
343 an equal number (5/10, 50.0%) of wild-type homozygotes and heterozygotes amongst the  
344 dead mosquitoes. For deltamethrin, only dead mosquitoes were genotyped due to limitations  
345 at the time of the bioassay. Mosquitoes from Dhaka that were dead after exposure to  
346 deltamethrin had similar frequencies of all three genotypes. However, the mosquitoes from  
347 outside of Dhaka did not include any mutant homozygotes (Table 2).

348 Of the 170 mosquitoes screened for Cys1534 mutation, 110 mosquitoes were from  
349 permethrin bioassays and the remaining were from deltamethrin bioassays from both Dhaka  
350 and non-Dhaka populations. From the permethrin phenotyped Dhaka mosquitoes, 54.1%  
351 (33/61) of the resistant (surviving) mosquitoes were 1534 mutant homozygotes (CC) and  
352 41.0% (25/61) were wild type homozygotes (FF). In case of permethrin-susceptible  
353 mosquitoes, 90.0% (9/10) were FF and the remaining individual was CC. From the non-  
354 Dhaka populations, 37.9% (11/29) of permethrin-resistant mosquitoes were CC and 27.6%  
355 (8/29) were heterozygotes (FC). Interestingly, none of the permethrin-susceptible mosquitoes  
356 from the non-Dhaka sites was FF, and 8/10 were CC. The correlations between genotype and  
357 phenotypes of permethrin exposed mosquitoes in both populations were statistically  
358 significant ( $p < 0.016$  for Dhaka and  $p < 0.043$  for non-Dhaka). A total of 60 dead mosquitoes  
359 from the deltamethrin bioassays were analyzed for Cys1534. Interestingly, most of the  
360 mosquitoes were wild-type homozygotes FF (65.5%, 19/30) in Dhaka, whereas, the opposite  
361 was seen for non-Dhaka populations (Table 3).

362



363 Table 2. Phenotype and genotype at *kdr* locus 1016 in mosquitoes exposed to permethrin and  
 364 deltamethrin from Dhaka and non-Dhaka populations. GG, mutant homozygotes; VV,  
 365 wildtype homozygotes; and VG heterozygotes.

|           |          | Permethrin 1X   |                | Deltamethrin 1X |
|-----------|----------|-----------------|----------------|-----------------|
| Dhaka     | Genotype | Phenotype       |                | Phenotype       |
|           |          | Alive<br>(n=74) | Dead<br>(n=14) | Dead<br>(n=29)  |
|           | VV       | 22<br>(29.7 %)  | 12<br>(85.7%)  | 9<br>(31.0%)    |
|           | VG       | 24<br>(32.4%)   | 1<br>(7.1%)    | 9<br>(31.0%)    |
|           | GG       | 28<br>(37.8%)   | 1<br>(7.1%)    | 11<br>(37.9%)   |
|           | <i>p</i> | <b>0.000</b>    |                |                 |
| Non-Dhaka | Genotype | Phenotype       |                | Phenotype       |
|           |          | Alive<br>(n=44) | Dead<br>(n=10) | Dead<br>(n=30)  |
|           | VV       | 12<br>(27.3%)   | 5<br>(50.0%)   | 14<br>(46.7%)   |
|           | VG       | 23<br>(52.3%)   | 5<br>(50.0%)   | 16<br>(53.3%)   |
|           | GG       | 9<br>(20.5%)    | 0              | 0               |
|           | <i>p</i> | 0.184           |                |                 |

366

367

368 Table 3. Phenotype and genotype at *kdr* locus 1534 in mosquitoes exposed to permethrin and  
 369 deltamethrin from Dhaka and non-Dhaka populations. CC, mutant homozygotes; FF,  
 370 wildtype homozygotes; and FC heterozygotes.

|           |          | Permethrin 1X   |                | Deltamethrin 1X |
|-----------|----------|-----------------|----------------|-----------------|
| Dhaka     | Genotype | Phenotype       |                | Phenotype       |
|           |          | Alive<br>(n=61) | Dead<br>(n=10) | Dead<br>(n=30)  |
|           | FF       | 25<br>(41.0%)   | 9<br>(90.0%)   | 19<br>(63.3%)   |
|           | FC       | 3<br>(4.9%)     | 0              | 0               |
|           | CC       | 33<br>(54.1%)   | 1<br>(10.0%)   | 11<br>(36.7%)   |
|           | <i>p</i> | <b>0.016</b>    |                |                 |
| Non-Dhaka | Genotype | Phenotype       |                | Phenotype       |
|           |          | Alive<br>(n=29) | Dead<br>(n=10) | Dead<br>(n=30)  |
|           | FF       | 10<br>(34.5%)   | 0              | 2<br>(6.7%)     |
|           | FC       | 8<br>(27.6%)    | 2<br>(20.0%)   | 9<br>(30.0%)    |
|           | CC       | 11<br>(37.9%)   | 8<br>(80.0%)   | 19<br>(63.3%)   |
|           | <i>p</i> | <b>0.043</b>    |                |                 |

371

372 All mosquitoes (n=264) from permethrin and deltamethrin bioassays (1X and 2X)

373 genotyped for Leu410 were found to be wild-type homozygotes.

374 Of the 177 non-phenotyped mosquitoes from the Dhaka populations, more than half were  
375 V1016G heterozygotes (51%, n=90/177). The highest Gly1016 homozygote (GG) frequency  
376 was observed in Gulshan & Karail (77%, n=23/30) followed by Mirpur (47%, n=14/30) and  
377 Malibagh (38%, n=11/29) (Fig 4). In the case of Cys1534, the largest group of the  
378 mosquitoes were homozygous wild type (FF) (43.5%, n=77/177). The highest mutant  
379 homozygote (CC) frequency was recorded from Dhanmondi & Mohammadpur (41.4%,  
380 n=12/29) (Fig 5).

381 The overall allele frequency of Gly1016 was 57.1% (95% CI  $\pm$  8.41) and of Cys1534 was  
382 38.4% (95% CI  $\pm$  5.66). The highest frequency of Gly1016 was 85.0% (95% CI  $\pm$  30.42) in  
383 Gulshan & Karail. The highest frequency of Cys1534 was 63.8% (95% CI  $\pm$  23.22) in  
384 Dhanmondi & Mohammadpur (Table 4). The Hardy-Weinberg equilibrium (HWE) test  
385 revealed that three populations had significant departures from HWE. This includes the  
386 Azimpur population for Gly1016, the Uttara population for Cys1534, and the Mirpur  
387 population for both (Table 4).

388

389 Table 4. Frequency of Gly1016 (G) and Cys1534 (C) *kdr* alleles in *Ae. aegypti* populations  
 390 from Dhaka

| Populations             | Allele | n  | % Frequency | 95% CI | p-value of HWE |
|-------------------------|--------|----|-------------|--------|----------------|
| Azimpur                 | G      | 29 | 48.3        | 17.6   | 0.0008*        |
|                         | C      |    | 50.0        | 18.2   | 0.4719         |
| Dhanmondi & Mohammadpur | G      | 29 | 41.4        | 15.1   | 0.0526         |
|                         | C      |    | 63.8        | 23.22  | 1.000          |
| Gulshan & Karail        | G      | 30 | 85.0        | 30.4   | 0.0991         |
|                         | C      |    | 43.3        | 15.5   | 0.4540         |
| Malibagh                | G      | 29 | 65.5        | 23.9   | 0.4194         |
|                         | C      |    | 25.9        | 9.4    | 0.0546         |
| Mirpur                  | G      | 30 | 55.3        | 19.1   | 0.0000*        |
|                         | C      |    | 18.3        | 6.6    | 0.0001*        |
| Uttara                  | G      | 30 | 48.3        | 17.3   | 0.0654         |
|                         | C      |    | 43.3        | 15.5   | 0.0024*        |

391 \* significant p-values

392

## 393 Discussion

394 The application of chemical insecticides either in the form of space sprays, thermal fogging,  
395 or LLINs has been carried out for many years in Bangladesh. However, documents of  
396 mosquito susceptibility to insecticides are scanty. Some information can be obtained from the  
397 'Malaria Threat Map' website about insecticide resistance in some *Anopheles* species [45]. A  
398 recent article reported permethrin and deltamethrin resistance in the highest malarious region  
399 in *Anopheles vagus* [34]. However, these reports are limited to phenotypic characteristics and  
400 no clear understanding of resistance mechanisms for any mosquito species is available.

401 Despite the increasing prevalence of *Aedes*-borne diseases in Bangladesh, the insecticide  
402 resistance status of *Ae. aegypti* has previously not been assessed. The results reported here  
403 provide a comprehensive overview of insecticide resistance across Dhaka, and in several  
404 other sites of high epidemiological importance. We report a high frequency and intensity of  
405 permethrin resistance in all populations that were studied. Despite this high level of  
406 permethrin resistance, susceptibility to deltamethrin was still present in several of the  
407 populations. This difference suggests that the underlying mechanisms causing resistant  
408 phenotypes in these populations may not be shared across the pyrethroid class.

409 The increased activity of enzymes including  $\beta$  esterases and mixed-function oxidases in the  
410 populations suggests an important role of metabolic mechanisms in conferring resistance. All  
411 Dhaka populations had elevated levels of esterase and oxidase activity and were resistant to  
412 permethrin. Outside of Dhaka, esterase activity was notably lower in Chapai Nawabganj and  
413 Rajshahi, and while both populations were resistant to permethrin, the latter population  
414 remained susceptible to deltamethrin (the former was not tested). Increased activity of  
415 esterases and oxidases may also be associated with the malathion resistance that was detected  
416 in Gulshan & Karail and Bandarban [46-49]. In addition, AChE activity was elevated in

417 Gulshan & Karail and could also be contributing to the malathion resistance that was detected  
418 there. An important limitation of the biochemical assay data is the lack of information on  
419 glutathione S-transferases (GSTs). A growing body of evidence suggests that these are  
420 important mechanisms in pyrethroid resistance in *Ae. aegypti* [50], with *GSTe2* associated  
421 with resistance to both permethrin and deltamethrin, and *GSTe7* with deltamethrin [51, 52].

422 The Gly1016 and Cys1534 *kdr* mutations have been widely reported in Asia [41, 53, 54].  
423 An additional mutation, Leu410, has also been reported in association with pyrethroid  
424 resistance, but its prevalence in Asia has not yet been well studied [23]. Expression of insect  
425 sodium channels in *Xenopus* oocytes coupled with electro-neurophysiological measurements  
426 has demonstrated that Gly1016, Cys1534, and Leu410 reduce the sensitivity of the VGSC to  
427 permethrin and deltamethrin [23, 55]. However, Leu410 was not detected in any of the  
428 populations in the current study. This is unexpected, as previous research has suggested the  
429 parallel evolution of this mutation together with the polymorphisms at positions 1016 and  
430 1534 [42], both of which were detected at moderate to high frequencies in our study. The co-  
431 occurrence of Pro989 with Gly1016 conferring high pyrethroid resistance in *Ae. aegypti* has  
432 been reported previously [56]. However, this current study did not include S989P *kdr*  
433 detection.

434 The *kdr* mutations Gly1016 and Cys1534 were found at varying frequencies across Dhaka.  
435 This fine-scale spatial heterogeneity suggests that selection pressures for insecticide  
436 resistance are variable across small spatial scales within Dhaka, and reflects trends that have  
437 been reported elsewhere [43, 57]. Historically, *Aedes* control in Dhaka and major cities in  
438 Bangladesh solely depends on thermal fogging using a combination of pyrethroid  
439 insecticides. Pyrethroids are also commonly used in households via commercially available  
440 coils and aerosols. Both operational and domestic insecticide use may contribute to  
441 insecticide resistance selection pressures in *Ae. aegypti* [58].

442 In Dhaka, 1016G and 1534C homozygous mutants were mostly associated with survival in  
443 the permethrin bioassays. It is also worth noting that the population from the Dhaka  
444 neighborhood of Mirpur was resistant to permethrin yet susceptible to deltamethrin and was  
445 also the population with the highest frequency of Val1016 and Phe1534 wild-type  
446 homozygotes. These findings suggest that while *kdr* alleles may be contributing to the  
447 insecticide resistance that was detected, they are not the only mechanism and such  
448 relationship is not rare [56, 59].

449 From an operational perspective, the data presented here will be important in guiding the  
450 choice of vector control tools. Given the widespread and intense permethrin resistance that  
451 was detected, vector control products containing alternative compounds should be used.  
452 Although some populations remained susceptible to deltamethrin, given the high degree of  
453 permethrin resistance, it would be prudent to search for alternatives outside of the pyrethroid  
454 class. Particularly notable was the detection of deltamethrin resistance in Bandarban, where  
455 deltamethrin-treated bed nets are routinely used for malaria control [34]. Bandarban was also  
456 the only non-Dhaka site to show significantly elevated esterase activity, suggesting that the  
457 population was experiencing comparatively greater selective pressure across multiple  
458 mechanisms as compared to the other non-Dhaka sites. Vector control activities have focused  
459 largely on malaria vectors and have not routinely targeted *Aedes* in this part of Bangladesh.  
460 The finding that the *Aedes* population was resistant to the insecticide relied upon for malaria  
461 control highlights the importance of implementing strategies based on integrated vector  
462 management in Bandarban.

463 The only insecticide to which every population tested was susceptible was bendiocarb.  
464 However, there is no product registered in Bangladesh that could be employed for *Aedes*  
465 control that contains bendiocarb as an active ingredient. Therefore, malathion came out as the  
466 next best candidate, as public health agencies were desperately seeking alternatives to

467 pyrethroids. Nevertheless, malathion resistance was detected in several of the populations  
468 studied, both inside and outside of Dhaka. Also, malathion has been used in agriculture for  
469 many years in Bangladesh, so selection pressure outside of vector control already exists to a  
470 certain degree [60, 61]. In such a scenario as we detected in Bangladesh with a patchwork of  
471 insecticide-resistant phenotypes, it will be challenging to find a ‘one size fits all’ solution for  
472 *Aedes* control.

## 473 **Conclusion**

474 This current study provides evidence of insecticide resistance in *Ae. aegypti* and data on  
475 resistance mechanisms including detoxification enzymes and *kdr* mutations in Bangladesh.  
476 High pyrethroid resistance may be compromising the existing *Aedes* control strategies, and  
477 the presence of multiple resistance mechanisms poses further challenges regarding  
478 alternatives. Continuous surveillance of insecticide resistance will enable trends in  
479 susceptibility to be monitored over space and time and will provide a more robust evidence  
480 base upon which to select the most effective vector control tools and strategies. In cities like  
481 Dhaka where operational control faces challenges posed by insecticide resistance, in addition  
482 to the rational use of chemicals, sustainable and alternative tools like biocontrol approaches  
483 should be considered.

## 484 **Acknowledgments**

485 This study was funded by U.S. Centers for Disease Control and Prevention (CDC, Atlanta,  
486 USA), grant number 3U01GH001207-03S1. icddr,b acknowledges with gratitude the  
487 commitment of CDC to its research efforts. icddr,b is also grateful to the Governments of  
488 Bangladesh, Canada, Sweden, and the UK for providing core/unrestricted support.

489



## 490 **Impact**

491 The preliminary results were disseminated among different stakeholders and mosquito  
492 control authorities immediately after analyzing the data. Followed by the outbreak of dengue  
493 during the monsoon season of 2019 this research findings and recommendations were  
494 reinvestigated by the policymakers. As a result, permethrin was replaced by malathion for the  
495 control of adult mosquitoes in Dhaka city [62, 63].

## 496 **Disclaimer**

497 The findings and conclusions in this paper are those of the authors and do not necessarily  
498 represent the official position of the CDC.

## 499 **Author Contributions**

500 **Conceptualization:** Hasan Mohammad Al-Amin, Seth Irish, Mohammad Shafiul Alam,  
501 Audrey Lenhart.

502 **Data Curation:** Hasan Mohammad Al-Amin, Fatema Tuj Johora, Lucrecia Vizcaino,  
503 Mohammad Riadul Haque Hossainey.

504 **Formal analysis:** Hasan Mohammad Al-Amin.

505 **Investigation:** Hasan Mohammad Al-Amin, Seth Irish, Mohammad Shafiul Alam, Audrey  
506 Lenhart, Kishor Kumar Paul.

507 **Methodology:** Hasan Mohammad Al-Amin, Seth Irish, Mohammad Shafiul Alam, Audrey  
508 Lenhart.

509 **Project administration:** Hasan Mohammad Al-Amin, Fatema Tuj Johora, Mohammad  
510 Riadul Haque Hossainey, Mohammad Shafiul Alam, Audrey Lenhart.

511 **Resources:** Hasan Mohammad Al-Amin, Fatema Tuj Johora, Mohammad Riadul Haque  
512 Hossainey, Mohammad Shafiul Alam, Audrey Lenhart.

513 **Supervision:** Seth Irish, Mohammad Shafiul Alam, Audrey Lenhart, Kishor Kumar Paul,  
514 Wasif A. Khan, Rashidul Haque.

515 **Validation:** Hasan Mohammad Al-Amin, Mohammad Shafiul Alam, Audrey Lenhart.

516 **Visualization:** Hasan Mohammad Al-Amin

517 **Writing - original draft:** Hasan Mohammad Al-Amin, Mohammad Shafiul Alam, Audrey  
518 Lenhart.

519 **Writing – review & editing:** Hasan Mohammad Al-Amin, Fatema Tuj Johora, Mohammad  
520 Shafiul Alam, Audrey Lenhart, Seth Irish, Kishor Kumar Paul, Wasif A. Khan, Rashidul  
521 Haque.

522 **List of figures:**

523 Fig 1. Bioassay results (% Morality at 30 minutes  $\pm$ 95% confidence intervals) for female *Ae.*  
524 *aegypti* in Dhaka. Red columns refer to resistant, green columns refer to susceptible and  
525 yellow column refers to resistant developing *Ae. aegypti*

526 Fig 2. Bioassay results (% Morality at 30 minutes  $\pm$ 95% confidence intervals) for female *Ae.*  
527 *aegypti* from four non-Dhaka locations. Red columns refer to resistant, green columns refer  
528 to susceptible *Ae. aegypti*, red dashed line indicates 90% mortality threshold

529 Fig 3. Enzyme activity levels in populations of *Ae. aegypti* from Bangladesh compared to the  
530 susceptible ROCK strain. Box plots denote the 50 percentile of the mean OD values,  
531 whiskers are the remaining percentile values, and the dots are outliers

532 Fig 4. Allele frequencies of Gly1016 in *Ae. aegypti* populations from Dhaka

533 Fig 5. Allele frequencies of Cys1534 in *Ae. aegypti* populations from Dhaka

534

## 535 References

- 536 1. Bhatt S, Gething PW, Brady OJ, Messina JP, Farlow AW, Moyes CL, et al. The  
537 global distribution and burden of dengue. *Nature*. 2013;496(7446):504-7. Epub 2013/04/09.  
538 doi: 10.1038/nature12060. PubMed PMID: 23563266; PubMed Central PMCID:  
539 PMCPMC3651993.
- 540 2. Sissoko D, Malvy D, Ezzedine K, Renault P, Moschetti F, Ledrans M, et al. Post-  
541 epidemic Chikungunya disease on Reunion Island: course of rheumatic manifestations and  
542 associated factors over a 15-month period. *PLoS Negl Trop Dis*. 2009;3(3):e389. Epub  
543 2009/03/11. doi: 10.1371/journal.pntd.0000389. PubMed PMID: 19274071; PubMed Central  
544 PMCID: PMCPMC2647734.
- 545 3. Couturier E, Guillemin F, Mura M, Leon L, Virion JM, Letort MJ, et al. Impaired  
546 quality of life after chikungunya virus infection: a 2-year follow-up study. *Rheumatology*  
547 (Oxford). 2012;51(7):1315-22. Epub 2012/03/20. doi: 10.1093/rheumatology/kes015.  
548 PubMed PMID: 22427407.
- 549 4. Paixao ES, Barreto F, Teixeira Mda G, Costa Mda C, Rodrigues LC. History,  
550 Epidemiology, and Clinical Manifestations of Zika: A Systematic Review. *Am J Public*  
551 *Health*. 2016;106(4):606-12. Epub 2016/03/10. doi: 10.2105/AJPH.2016.303112. PubMed  
552 PMID: 26959260; PubMed Central PMCID: PMCPMC4816002.
- 553 5. Banu S, Hu W, Hurst C, Guo Y, Islam MZ, Tong S. Space-time clusters of dengue  
554 fever in Bangladesh. *Trop Med Int Health*. 2012;17(9):1086-91. Epub 2012/07/20. doi:  
555 10.1111/j.1365-3156.2012.03038.x. PubMed PMID: 22809407.
- 556 6. Sharmin S, Viennet E, Glass K, Harley D. The emergence of dengue in Bangladesh:  
557 epidemiology, challenges and future disease risk. *Trans R Soc Trop Med Hyg*.  
558 2015;109(10):619-27. Epub 2015/09/04. doi: 10.1093/trstmh/trv067. PubMed PMID:  
559 26333430.
- 560 7. Salje H, Paul KK, Paul R, Rodriguez-Barraquer I, Rahman Z, Alam MS, et al.  
561 Nationally-representative serostudy of dengue in Bangladesh allows generalizable disease  
562 burden estimates. *Elife*. 2019;8. Epub 2019/04/09. doi: 10.7554/eLife.42869. PubMed PMID:  
563 30958263; PubMed Central PMCID: PMCPMC6513551.
- 564 8. Dengue Current Situation: IEDCR; [updated 25 April 2020; cited 2020 26 April].  
565 Available from: <https://www.iedcr.gov.bd/index.php/dengue/219>.
- 566 9. Hossain MS, Hasan MM, Islam MS, Islam S, Mozaffor M, Khan MAS, et al.  
567 Chikungunya outbreak (2017) in Bangladesh: Clinical profile, economic impact and quality  
568 of life during the acute phase of the disease. *PLoS Negl Trop Dis*. 2018;12(6):e0006561.  
569 Epub 2018/06/07. doi: 10.1371/journal.pntd.0006561. PubMed PMID: 29874242; PubMed  
570 Central PMCID: PMCPMC6025877.
- 571 10. Muraduzzaman AKM, Sultana S, Shirin T, Khatun S, Islam M, Rahman M.  
572 Introduction of Zika virus in Bangladesh: An impending public health threat. *Asian Pac J*  
573 *Trop Med*. 2017;10(9):925-8. Epub 2017/10/31. doi: 10.1016/j.apjtm.2017.08.015. PubMed  
574 PMID: 29080624.
- 575 11. GeurtsvanKessel CH, Islam Z, Islam MB, Kamga S, Papri N, van de Vijver D, et al.  
576 Zika virus and Guillain-Barre syndrome in Bangladesh. *Ann Clin Transl Neurol*.  
577 2018;5(5):606-15. Epub 2018/05/16. doi: 10.1002/acn3.556. PubMed PMID: 29761123;  
578 PubMed Central PMCID: PMCPMC5945960.
- 579 12. Aktaruzzaman MM. Dissemination Workshop on Monsoon *Aedes* Survey in Dhaka  
580 North & South City Corporations. In: Programme MaAC, editor.: Communicable Disease  
581 Control, DGHS; 2018.

- 582 13. Paul KK, Dhar-Chowdhury P, Haque CE, Al-Amin HM, Goswami DR, Kafi MAH, et  
583 al. Risk factors for the presence of dengue vector mosquitoes, and determinants of their  
584 prevalence and larval site selection in Dhaka, Bangladesh. PLoS One. 2018;13(6):e0199457.  
585 Epub 2018/06/22. doi: 10.1371/journal.pone.0199457. PubMed PMID: 29928055; PubMed  
586 Central PMCID: PMC6013170.
- 587 14. Organization WH. Dengue: guidelines for diagnosis, treatment, prevention and  
588 control: World Health Organization; 2009.
- 589 15. Marcombe S, Darriet F, Tolosa M, Agnew P, Duchon S, Etienne M, et al. Pyrethroid  
590 resistance reduces the efficacy of space sprays for dengue control on the island of Martinique  
591 (Caribbean). PLoS Negl Trop Dis. 2011;5(6):e1202. Epub 2011/06/30. doi:  
592 10.1371/journal.pntd.0001202. PubMed PMID: 21713017; PubMed Central PMCID:  
593 PMC3119637.
- 594 16. Maciel-de-Freitas R, Avendanho FC, Santos R, Sylvestre G, Araujo SC, Lima JB, et  
595 al. Undesirable consequences of insecticide resistance following *Aedes aegypti* control  
596 activities due to a dengue outbreak. PLoS One. 2014;9(3):e92424. Epub 2014/03/29. doi:  
597 10.1371/journal.pone.0092424. PubMed PMID: 24676277; PubMed Central PMCID:  
598 PMC3968006.
- 599 17. Plernsub S, Saingamsook J, Yanola J, Lumjuan N, Tippawangkosol P, Walton C, et  
600 al. Temporal frequency of knockdown resistance mutations, F1534C and V1016G, in *Aedes*  
601 *aegypti* in Chiang Mai city, Thailand and the impact of the mutations on the efficiency of  
602 thermal fogging spray with pyrethroids. Acta Trop. 2016;162:125-32. Epub 2016/06/22. doi:  
603 10.1016/j.actatropica.2016.06.019. PubMed PMID: 27325294.
- 604 18. Moyes CL, Vontas J, Martins AJ, Ng LC, Koou SY, Dusfour I, et al. Contemporary  
605 status of insecticide resistance in the major *Aedes vectors* of arboviruses infecting humans.  
606 PLoS Negl Trop Dis. 2017;11(7):e0005625. Epub 2017/07/21. doi:  
607 10.1371/journal.pntd.0005625. PubMed PMID: 28727779; PubMed Central PMCID:  
608 PMC5518996.
- 609 19. Dusfour I, Vontas J, David JP, Weetman D, Fonseca DM, Corbel V, et al.  
610 Management of insecticide resistance in the major *Aedes* vectors of arboviruses: Advances  
611 and challenges. PLoS Negl Trop Dis. 2019;13(10):e0007615. Epub 2019/10/11. doi:  
612 10.1371/journal.pntd.0007615. PubMed PMID: 31600206; PubMed Central PMCID:  
613 PMC6786541.
- 614 20. Devine GJ, Denholm I. Insecticide and acaricide resistance. Encyclopedia of Insects:  
615 Elsevier; 2009. p. 505-11.
- 616 21. WHO. Techniques to detect insecticide resistance mechanisms (field and laboratory  
617 manual). World Health Organization, 1998.
- 618 22. Dong K, Du Y, Rinkevich F, Nomura Y, Xu P, Wang L, et al. Molecular biology of  
619 insect sodium channels and pyrethroid resistance. Insect biochemistry and molecular biology.  
620 2014;50:1-17. doi: 10.1016/j.ibmb.2014.03.012. PubMed PMID: 24704279.
- 621 23. Haddi K, Tome HVV, Du Y, Valbon WR, Nomura Y, Martins GF, et al. Detection of  
622 a new pyrethroid resistance mutation (V410L) in the sodium channel of *Aedes aegypti*: a  
623 potential challenge for mosquito control. Sci Rep. 2017;7:46549. Epub 2017/04/20. doi:  
624 10.1038/srep46549. PubMed PMID: 28422157; PubMed Central PMCID:  
625 PMC5396194.
- 626 24. Hemingway J, Ranson H. Insecticide resistance in insect vectors of human disease.  
627 Annu Rev Entomol. 2000;45:371-91. Epub 2000/04/13. doi: 10.1146/annurev.ento.45.1.371.  
628 PubMed PMID: 10761582.
- 629 25. Usuga AF, Zuluaga-Idarraga LM, Alvarez N, Rojo R, Henao E, Rua-Urbe GL.  
630 Barriers that limit the implementation of thermal fogging for the control of dengue in  
631 Colombia: a study of mixed methods. BMC Public Health. 2019;19(1):669. Epub

- 632 2019/05/31. doi: 10.1186/s12889-019-7029-1. PubMed PMID: 31146722; PubMed Central  
633 PMCID: PMC6543676.
- 634 26. Correspondent S. Bangladesh set an example of failure in dengue prevention. The  
635 Daily Star. 2019.
- 636 27. Correspondent S. No fund for mosquito control activities. The Daily Star. 2019.
- 637 28. Anonymous. First identified outbreak of chikungunya in Bangladesh, 2008. Dhaka:  
638 icddr,b, 2009 Contract No.: 1.
- 639 29. Khatun S, Chakraborty A, Rahman M, Nasreen Banu N, Rahman MM, Hasan SM, et  
640 al. An Outbreak of Chikungunya in Rural Bangladesh, 2011. PLoS Negl Trop Dis.  
641 2015;9(7):e0003907. Epub 2015/07/15. doi: 10.1371/journal.pntd.0003907. PubMed PMID:  
642 26161995; PubMed Central PMCID: PMC64498910.
- 643 30. Salje H, Lessler J, Paul KK, Azman AS, Rahman MW, Rahman M, et al. How social  
644 structures, space, and behaviors shape the spread of infectious diseases using chikungunya as  
645 a case study. 2016;113(47):13420-5. doi: 10.1073/pnas.1611391113 %J Proceedings of the  
646 National Academy of Sciences.
- 647 31. Haque F, Rahman M, Banu NN, Sharif AR, Jubayer S, Shamsuzzaman A, et al. An  
648 epidemic of chikungunya in northwestern Bangladesh in 2011. PLoS One.  
649 2019;14(3):e0212218. Epub 2019/03/12. doi: 10.1371/journal.pone.0212218. PubMed  
650 PMID: 30856200; PubMed Central PMCID: PMC6411100.
- 651 32. Hsan K, Hossain MM, Sarwar MS, Wilder-Smith A, Gozal D. Unprecedented rise in  
652 dengue outbreaks in Bangladesh. Lancet Infect Dis. 2019;19(12):1287. Epub 2019/11/30. doi:  
653 10.1016/S1473-3099(19)30616-4. PubMed PMID: 31782396.
- 654 33. Chowdhury R, Chowdhury V, Faria S, Islam S, Maheswary NP, Akhter S, et al.  
655 Indoor residual spraying for kala-azar vector control in Bangladesh: A continuing challenge.  
656 PLoS Negl Trop Dis. 2018;12(10):e0006846. Epub 2018/10/03. doi:  
657 10.1371/journal.pntd.0006846. PubMed PMID: 30273402; PubMed Central PMCID:  
658 PMC6181438.
- 659 34. Alam MS, Al-Amin HM, Khan WA, Haque R, Nahlen BL, Lobo NF. Preliminary  
660 Report of Pyrethroid Resistance in *Anopheles vagus*, an Important Malaria Vector in  
661 Bangladesh. Am J Trop Med Hyg. 2020. Epub 2020/05/13. doi: 10.4269/ajtmh.20-0146.  
662 PubMed PMID: 32394878.
- 663 35. Anonymous. Chikungunya: 23 areas at higher risk in Dhaka. bdnews24com. 2017.
- 664 36. Costa-da-Silva AL, Navarrete FR, Salvador FS, Karina-Costa M, Ioshino RS,  
665 Azevedo DS, et al. Glytube: a conical tube and parafilm M-based method as a simplified  
666 device to artificially blood-feed the dengue vector mosquito, *Aedes aegypti*. PLoS One.  
667 2013;8(1):e53816. Epub 2013/01/24. doi: 10.1371/journal.pone.0053816. PubMed PMID:  
668 23342010; PubMed Central PMCID: PMC3544740.
- 669 37. Brogdon W, Chan A. Guidelines for evaluating insecticide resistance in vectors using  
670 the CDC bottle bioassay/methods in *Anopheles* research. CDC Atlanta USA: CDC Technical  
671 Report. 2010:28.
- 672 38. WHO. Test procedures for insecticide resistance monitoring in malaria vector  
673 mosquitoes. 2016.
- 674 39. Hemingway J, Brogdon W. Techniques to detect insecticide resistance mechanisms.  
675 1998.
- 676 40. Saavedra-Rodriguez K, Urdaneta-Marquez L, Rajatileka S, Moulton M, Flores AE,  
677 Fernandez-Salas I, et al. A mutation in the voltage-gated sodium channel gene associated  
678 with pyrethroid resistance in Latin American *Aedes aegypti*. Insect Mol Biol.  
679 2007;16(6):785-98. Epub 2007/12/21. doi: 10.1111/j.1365-2583.2007.00774.x. PubMed  
680 PMID: 18093007.



- 681 41. Yanola J, Somboon P, Walton C, Nachaiwieng W, Somwang P, Prapanthadara LA.  
682 High-throughput assays for detection of the F1534C mutation in the voltage-gated sodium  
683 channel gene in permethrin-resistant *Aedes aegypti* and the distribution of this mutation  
684 throughout Thailand. *Tropical medicine & international health : TM & IH*. 2011;16(4):501-9.  
685 doi: 10.1111/j.1365-3156.2011.02725.x. PubMed PMID: 21342372.
- 686 42. Saavedra-Rodriguez K, Maloof FV, Campbell CL, Garcia-Rejon J, Lenhart A, Penilla  
687 P, et al. Parallel evolution of vgsc mutations at domains IS6, IIS6 and IIIS6 in pyrethroid  
688 resistant *Aedes aegypti* from Mexico. *Sci Rep*. 2018;8(1):6747. Epub 2018/05/02. doi:  
689 10.1038/s41598-018-25222-0. PubMed PMID: 29712956; PubMed Central PMCID:  
690 PMCPMC5928250.
- 691 43. Deming R, Manrique-Saide P, Medina Barreiro A, Cardena EU, Che-Mendoza A,  
692 Jones B, et al. Spatial variation of insecticide resistance in the dengue vector *Aedes aegypti*  
693 presents unique vector control challenges. *Parasites & vectors*. 2016;9:67. Epub 2016/02/06.  
694 doi: 10.1186/s13071-016-1346-3. PubMed PMID: 26846468; PubMed Central PMCID:  
695 PMCPMC4743324.
- 696 44. Rousset F. genepop'007: a complete re-implementation of the genepop software for  
697 Windows and Linux. *Mol Ecol Resour*. 2008;8(1):103-6. Epub 2008/01/01. doi:  
698 10.1111/j.1471-8286.2007.01931.x. PubMed PMID: 21585727.
- 699 45. WHO. Vector insecticide resistance [cited 2020 03 July]. Available from:  
700 [https://apps.who.int/malaria/maps/threats/?theme=prevention&mapType=prevention%3A0&  
701 bounds=%5B%5B87.66488246615313%2C20.717484946543323%5D%2C%5B98.5682916  
702 0856773%2C26.61260734428494%5D%5D&insecticideClass=PYRETHROIDS&insecticide  
703 Types=&assayTypes=MOLECULAR\\_ASSAY%2CBIOCHEMICAL\\_ASSAY%2CSYNER  
704 GIST-  
705 INSECTICIDE\\_BIOASSAY&synergistTypes=&species=&vectorSpecies=&surveyTypes=&  
706 deletionType=HRP2\\_PROPORTION\\_DELETION&plasmodiumSpecies=P\\_FALCIPARUM  
707 &drug=DRUG\\_AL&mmType=1&endemicity=false&countryMode=false&storyMode=false  
708 &storyModeStep=0&filterOpen=true&filtersMode=filters&years=2010%2C2020](https://apps.who.int/malaria/maps/threats/?theme=prevention&mapType=prevention%3A0&bounds=%5B%5B87.66488246615313%2C20.717484946543323%5D%2C%5B98.56829160856773%2C26.61260734428494%5D%5D&insecticideClass=PYRETHROIDS&insecticideTypes=&assayTypes=MOLECULAR_ASSAY%2CBIOCHEMICAL_ASSAY%2CSYNERGIST-INSECTICIDE_BIOASSAY&synergistTypes=&species=&vectorSpecies=&surveyTypes=&deletionType=HRP2_PROPORTION_DELETION&plasmodiumSpecies=P_FALCIPARUM&drug=DRUG_AL&mmType=1&endemicity=false&countryMode=false&storyMode=false&storyModeStep=0&filterOpen=true&filtersMode=filters&years=2010%2C2020).
- 709 46. Paeporn P, Supaphathom K, Srisawat R, Komalamisra N, Deesin V, Ya-umphan P, et  
710 al. Biochemical detection of pyrethroid resistance mechanism in *Aedes aegypti* in Ratchaburi  
711 province, Thailand. *Trop Biomed*. 2004;21(2):145-51. Epub 2006/02/24. PubMed PMID:  
712 16493407.
- 713 47. Rodriguez MM, Bisset JA, Fernandez D. Levels of insecticide resistance and  
714 resistance mechanisms in *Aedes aegypti* from some Latin American countries. *J Am Mosq  
715 Control Assoc*. 2007;23(4):420-9. Epub 2008/02/05. doi: 10.2987/5588.1. PubMed PMID:  
716 18240518.
- 717 48. Alvarez LC, Ponce G, Oviedo M, Lopez B, Flores AE. Resistance to malathion and  
718 deltamethrin in *Aedes aegypti* (Diptera: Culicidae) from western Venezuela. *J Med Entomol*.  
719 2013;50(5):1031-9. PubMed PMID: 24180108.
- 720 49. Ngoagouni C, Kamgang B, Brengues C, Yahouedo G, Paupy C, Nakoune E, et al.  
721 Susceptibility profile and metabolic mechanisms involved in *Aedes aegypti* and *Aedes  
722 albopictus* resistant to DDT and deltamethrin in the Central African Republic. *Parasit  
723 Vectors*. 2016;9(1):599. Epub 2016/11/25. doi: 10.1186/s13071-016-1887-5. PubMed PMID:  
724 27881148; PubMed Central PMCID: PMCPMC5121976.
- 725 50. Aponte A, Penilla RP, Rodriguez AD, Ocampo CB. Mechanisms of pyrethroid  
726 resistance in *Aedes (Stegomyia) aegypti* from Colombia. *Acta tropica*. 2019;191:146-54.  
727 Epub 2018/12/16. doi: 10.1016/j.actatropica.2018.12.021. PubMed PMID: 30552882;  
728 PubMed Central PMCID: PMCPMC6447284.

- 729 51. Lumjuan N, McCarroll L, Prapanthadara L-a, Hemingway J, Ranson H. Elevated  
730 activity of an Epsilon class glutathione transferase confers DDT resistance in the dengue  
731 vector, *Aedes aegypti*. *Insect biochemistry and molecular biology*. 2005;35:861-71.
- 732 52. Lumjuan N, Rajatileka S, Changsom D, Wicheer J, Leelapat P, Prapanthadara LA, et  
733 al. The role of the *Aedes aegypti* Epsilon glutathione transferases in conferring resistance to  
734 DDT and pyrethroid insecticides. *Insect biochemistry and molecular biology*.  
735 2011;41(3):203-9. Epub 2011/01/05. doi: 10.1016/j.ibmb.2010.12.005. PubMed PMID:  
736 21195177.
- 737 53. Stenhouse SA, Plernsub S, Yanola J, Lumjuan N, Dantrakool A, Choochote W, et al.  
738 Detection of the V1016G mutation in the voltage-gated sodium channel gene of *Aedes*  
739 *aegypti* (Diptera: Culicidae) by allele-specific PCR assay, and its distribution and effect on  
740 deltamethrin resistance in Thailand. *Parasit Vectors*. 2013;6(1):253. Epub 2013/09/26. doi:  
741 10.1186/1756-3305-6-253. PubMed PMID: 24059267; PubMed Central PMCID:  
742 PMCPMC3765916.
- 743 54. Ishak IH, Jaal Z, Ranson H, Wondji CS. Contrasting patterns of insecticide resistance  
744 and knockdown resistance (kdr) in the dengue vectors *Aedes aegypti* and *Aedes albopictus*  
745 from Malaysia. *Parasit Vectors*. 2015;8:181. Epub 2015/04/19. doi: 10.1186/s13071-015-  
746 0797-2. PubMed PMID: 25888775; PubMed Central PMCID: PMCPMC4377062.
- 747 55. Hirata K, Komagata O, Itokawa K, Yamamoto A, Tomita T, Kasai S. A single  
748 crossing-over event in voltage-sensitive Na<sup>+</sup> channel genes may cause critical failure of  
749 dengue mosquito control by insecticides. *PLoS Negl Trop Dis*. 2014;8(8):e3085. Epub  
750 2014/08/29. doi: 10.1371/journal.pntd.0003085. PubMed PMID: 25166902; PubMed Central  
751 PMCID: PMCPMC4148226.
- 752 56. Kasai S, Komagata O, Itokawa K, Shono T, Ng LC, Kobayashi M, et al. Mechanisms  
753 of pyrethroid resistance in the dengue mosquito vector, *Aedes aegypti*: target site  
754 insensitivity, penetration, and metabolism. *PLoS Negl Trop Dis*. 2014;8(6):e2948. Epub  
755 2014/06/20. doi: 10.1371/journal.pntd.0002948. PubMed PMID: 24945250; PubMed Central  
756 PMCID: PMCPMC4063723.
- 757 57. Brito LP, Carrara L, de Freitas RM, Lima JBP, Martins AJ. Levels of Resistance to  
758 Pyrethroid among Distinct kdr Alleles in *Aedes aegypti* Laboratory Lines and Frequency of  
759 kdr Alleles in 27 Natural Populations from Rio de Janeiro, Brazil. *Biomed Res Int*.  
760 2018;2018:2410819. Epub 2018/08/17. doi: 10.1155/2018/2410819. PubMed PMID:  
761 30112367; PubMed Central PMCID: PMCPMC6077680.
- 762 58. Gray L, Florez SD, Barreiro AM, Vellido-Sanchez J, Gonzalez-Olvera G, Lenhart A,  
763 et al. Experimental evaluation of the impact of household aerosolized insecticides on  
764 pyrethroid resistant *Aedes aegypti*. *Sci Rep*. 2018;8(1):12535. Epub 2018/08/24. doi:  
765 10.1038/s41598-018-30968-8. PubMed PMID: 30135460; PubMed Central PMCID:  
766 PMCPMC6105583.
- 767 59. Martins AJ, Lins RM, Linss JG, Peixoto AA, Valle D. Voltage-gated sodium channel  
768 polymorphism and metabolic resistance in pyrethroid-resistant *Aedes aegypti* from Brazil.  
769 *Am J Trop Med Hyg*. 2009;81(1):108-15. Epub 2009/06/27. PubMed PMID: 19556575.
- 770 60. Hasanuzzaman M, Rahman MA, Salam MA. Identification and quantification of  
771 pesticide residues in water samples of Dhamrai Upazila, Bangladesh. *Applied Water Science*.  
772 2017;7(6):2681-8. doi: 10.1007/s13201-016-0485-1.
- 773 61. Numan A, Khan M, Uddin R, Rahman M, Bhuiyan M, Akter N. Risk Assessment of  
774 Commonly Used Major Pesticides for Tomato (*Solanum lycopersicum* L.) Cultivation in  
775 Bangladesh. *Adv in Nutr Fd Sci: ANAFS-109*. 2018.
- 776 62. Alam H. Insecticides ineffective on mosquitoes: icddr,b. *The Daily Star*. 2019.
- 777 63. Report SO. 2019. *The Daily Star*. DNCC to spray new insecticide from tomorrow to  
778 kill mosquito.

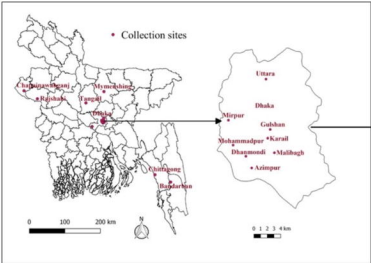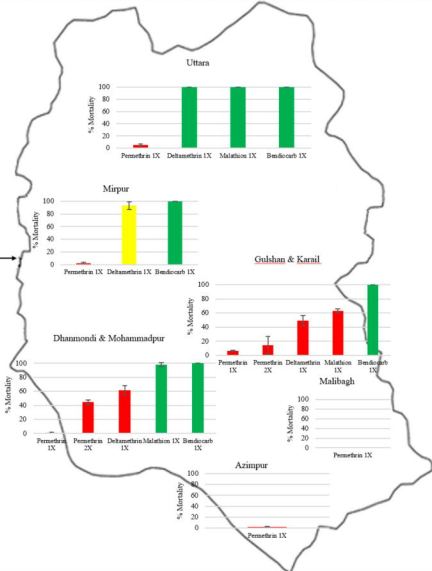



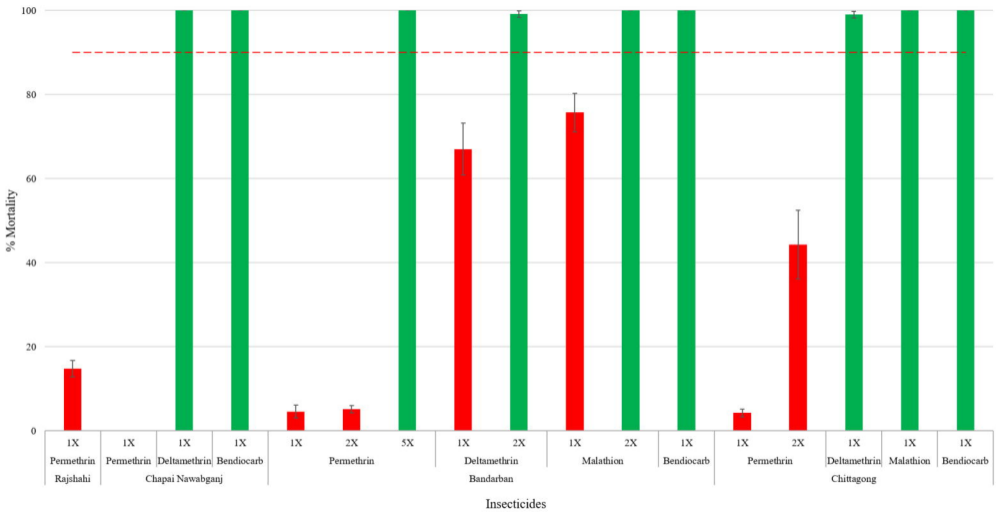

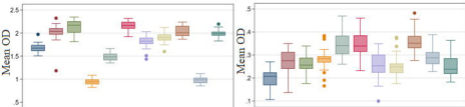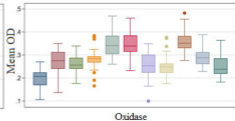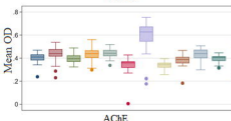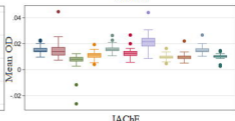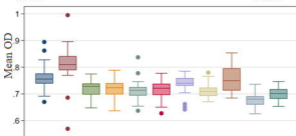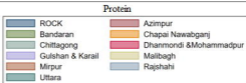

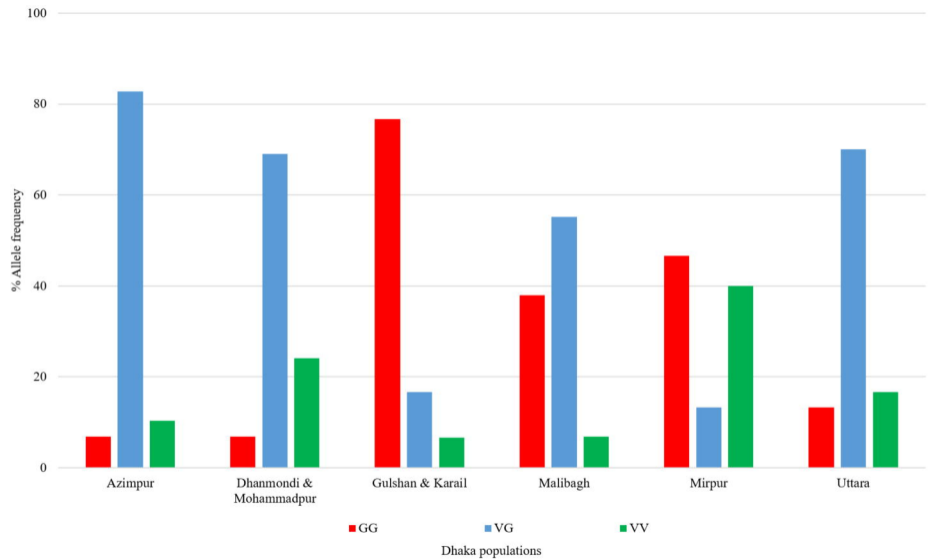

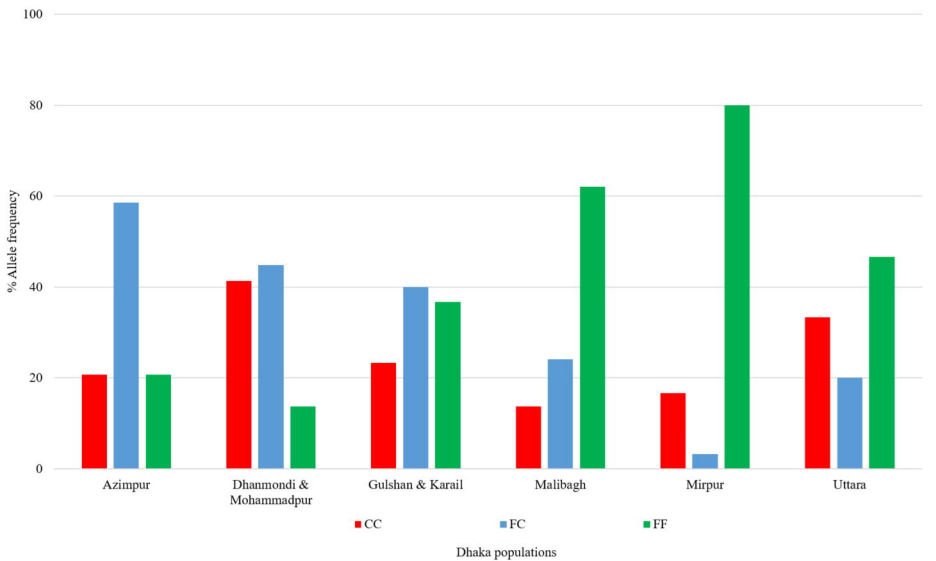

Source: https://www.biorxiv.org/content/10.1101/2020.07.31.231076v1.full.pdf
